# Supplementary material for: Fabrication of non-biofouling polyethylene glycol micro- and nanochannels by ultraviolet-assisted irreversible sealing
Source: Royal Society of Chemistry journal article supplement (doi:10.1039/b610503c), 2006-01-01
Supplement: b610503c.pdf [file b610503c.pdf]

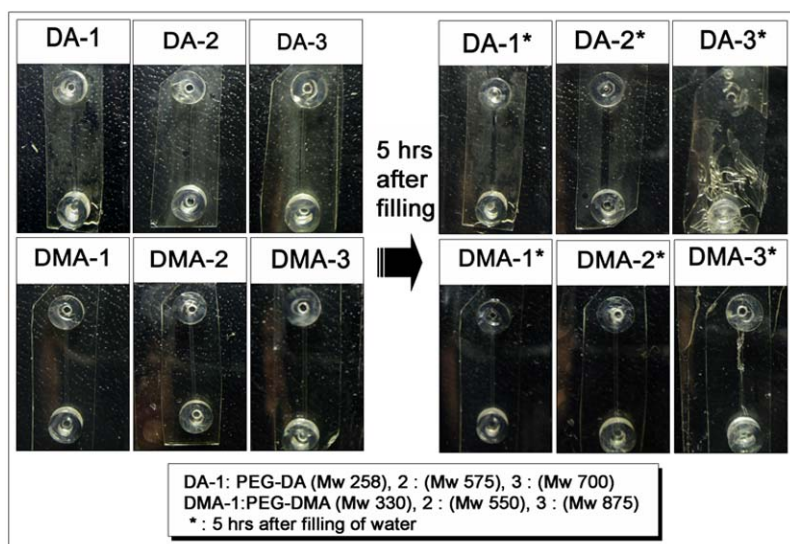

Fig. S1. Photographs showing the stability of various PEG microchannels under continuous contact with water for 5 hrs. Note that high Mw PEGs such as PEG-DA (Mw = 700) and PEG-DMA (Mw = 875) are prone to swelling and subsequent detachment.

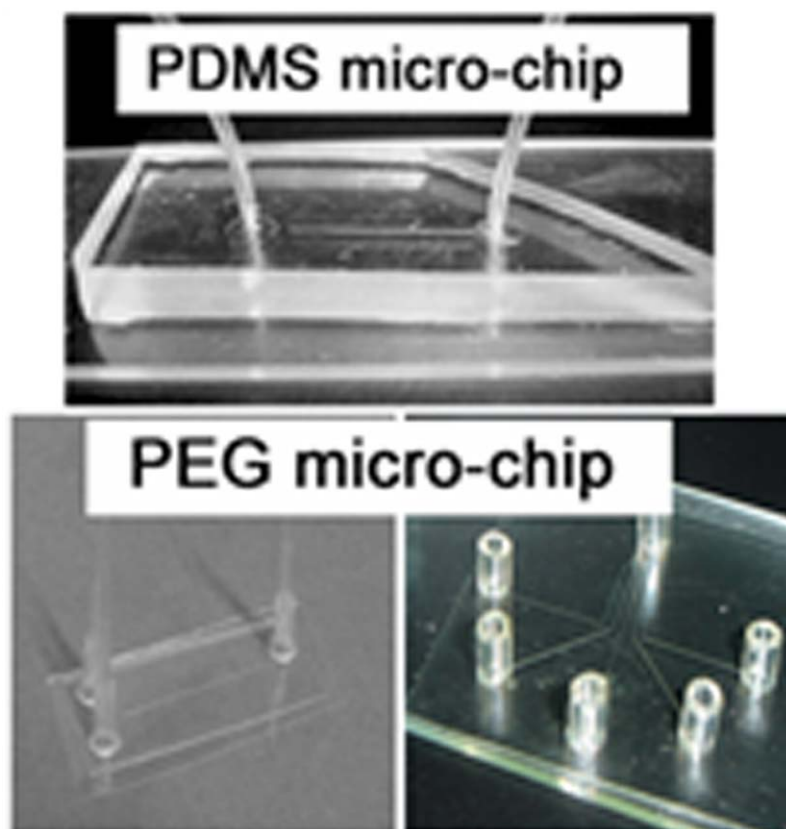

Fig. S2. Photographs showing completed PEG microchannel devices on PET film (bottom, left) and glass substrate (bottom, right), respectively. The devices resemble a standard PDMS microchannel device (top). The fabrication of the PEG device was similar to that of the PDMS device with one notable exception that holes were punched through a composite layer consisting of a PEG and a supporting PET layer to make reservoirs prior to attaching to a flexible or a solid substrate coated with a thin PEG layer (~20  $\mu\text{m}$ ).
